# Supplementary material for: An Outbred Guinea Pig Disease Model for Lassa Fever Using a Host-Adapted Clade III Nigerian Lassa Virus
Source: MDPI journal article supplement (doi:10.3390/v15030769), 2023-03-17
Supplement: s1 [file s1]

Table S1: Whole blood samples collected at specified times post-inoculation were tested for the presence of LASV RNA using a qualitative real-time RT-PCR assay.

| Day After Infection | Guinea Pig | Ct   | Average Ct |
|---------------------|------------|------|------------|
| Day 1               | 79         | 0    | 0          |
|                     | 80         | 0    |            |
|                     | 81         | 0    |            |
|                     | 82         | 0    |            |
| Day 3               | 83         | 37.4 | 36.7       |
|                     | 84         | 0    |            |
|                     | 85         | 35   |            |
|                     | 86         | 37.7 |            |
| Day 6               | 87         | 32.9 | 33.2       |
|                     | 88         | 32.3 |            |
|                     | 89         | 33.1 |            |
|                     | 90         | 34.4 |            |
| Day 9               | 91         | 33.6 | 31.8       |
|                     | 92         | 31.8 |            |
|                     | 93         | 30.5 |            |
|                     | 94         | 31.4 |            |
| Day 12              | 95         | 31.7 | 29.8       |
|                     | 96         | 28.8 |            |
|                     | 97         | 28.1 |            |
|                     | 98         | 30.4 |            |
| Day 15              | 104        | 33.3 | 33.3       |

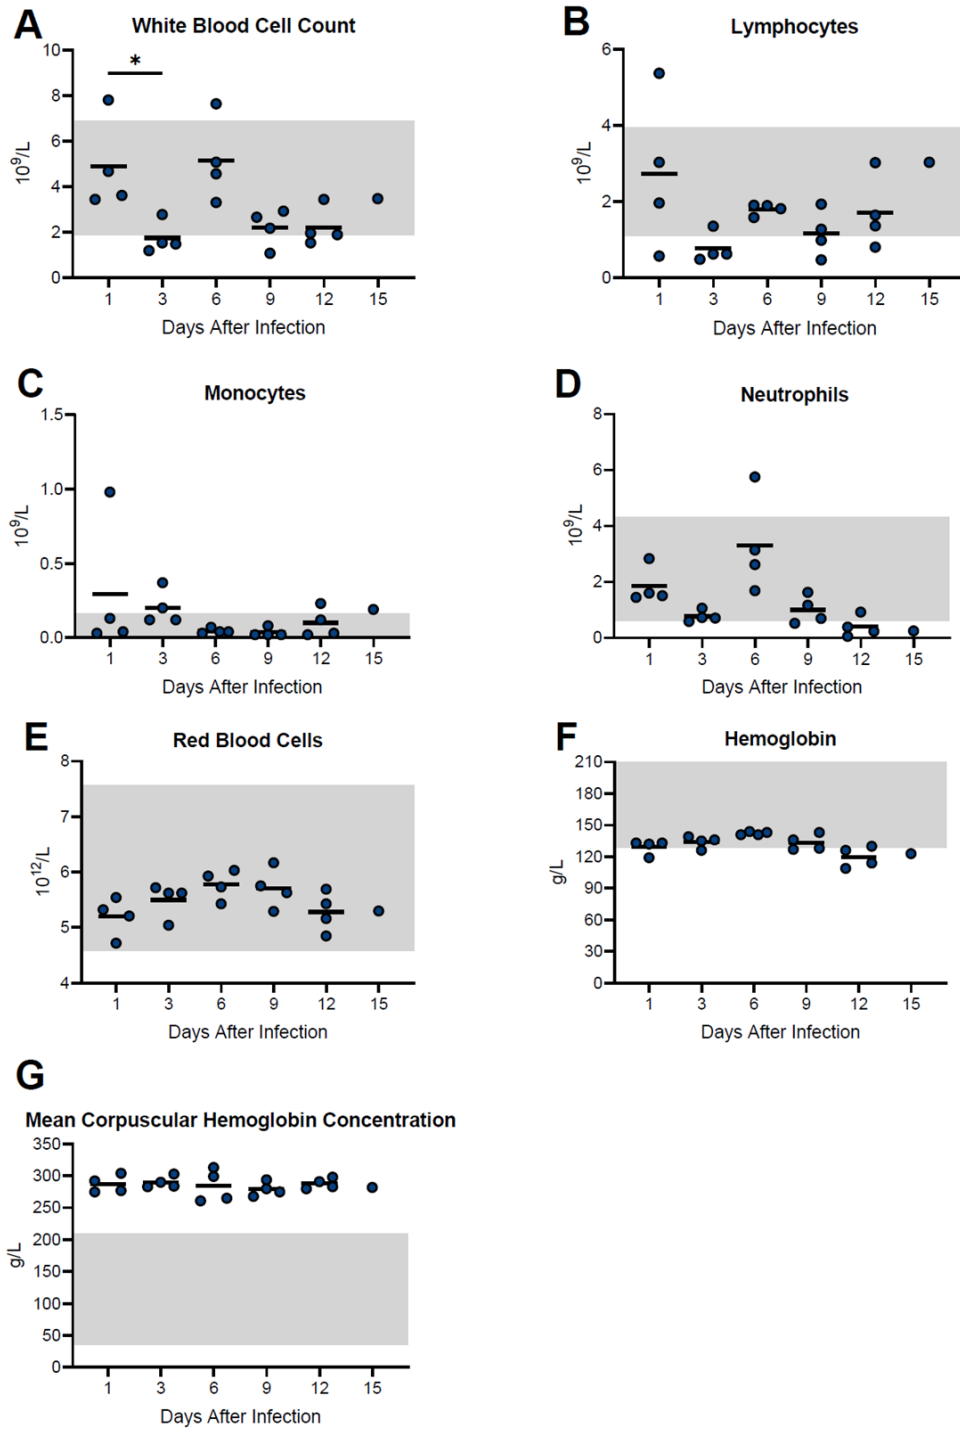

Figure S1: Groups of four animals were euthanized at indicated days post-inoculation and analyzed for hematological parameters. Shown are data for white blood cell count (A), lymphocytes (B), monocytes (C), neutrophils (D), red blood cells (E), hemoglobin (F), and mean corpuscular hemoglobin concentration (G). Dots represent individual animal values; bar represents group averages; Significant differences where  $p < 0.05$  are indicated by \*.

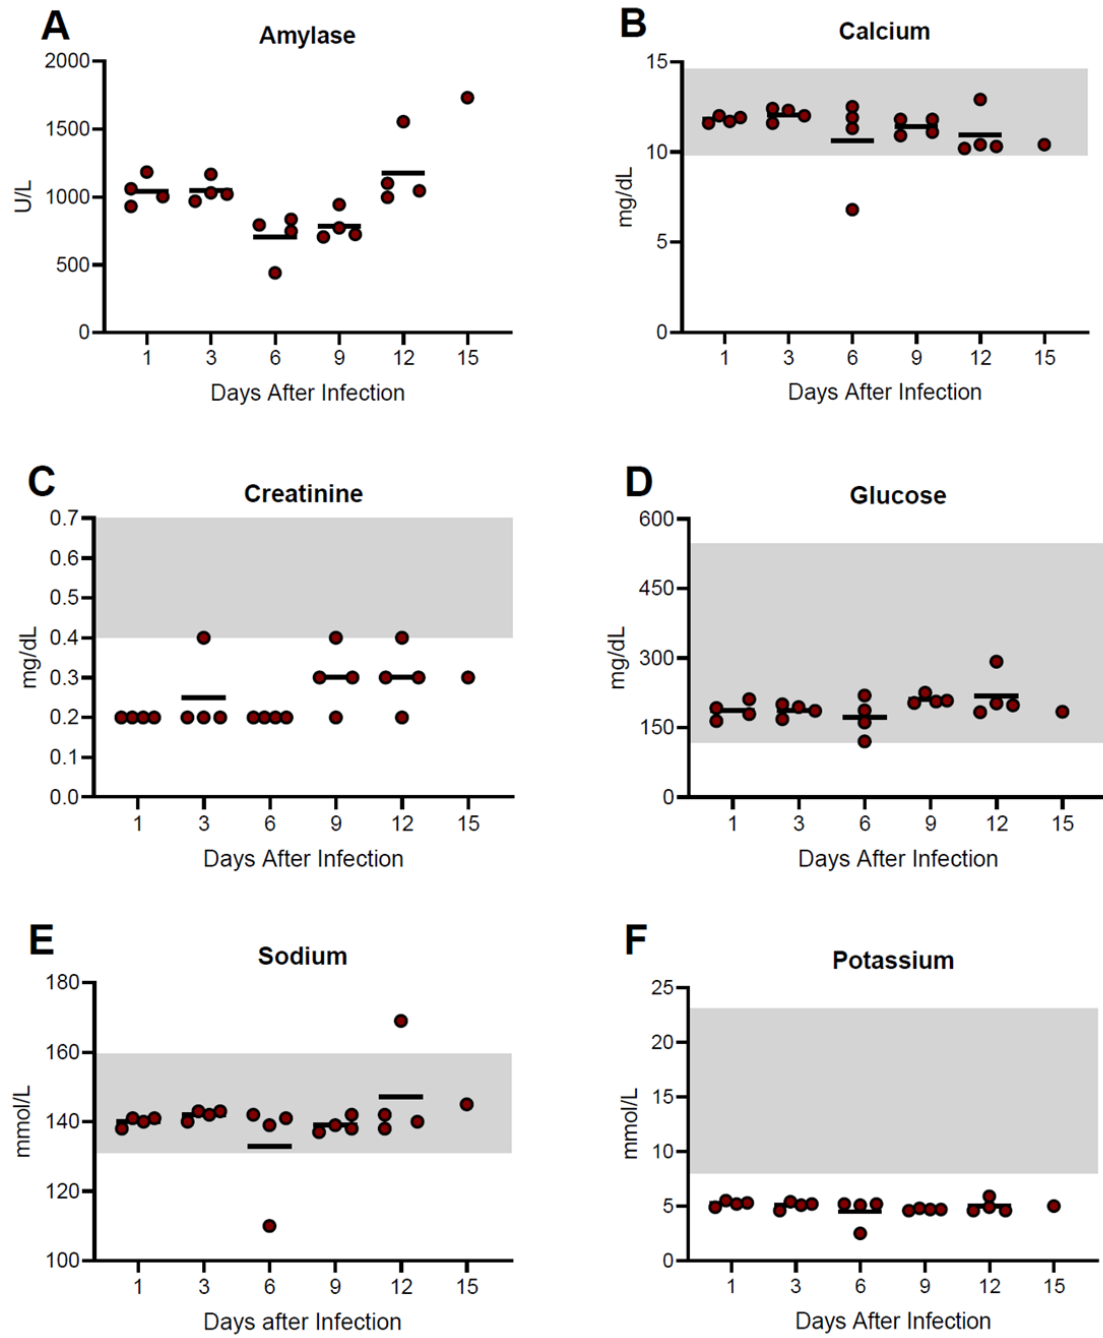

Figure S2: Groups of four animals were euthanized at indicated days post-inoculation and analyzed for biochemical parameters. Shown are data for amylase (A), calcium (B), creatinine (C), glucose (D), sodium (E), and potassium (F). Dots represent individual animal values. bar represents group averages. Where available, normal ranges are indicated by gray shading ([www.criver.com](http://www.criver.com), accessed on 8 March 2023).
